# Supplementary material for: Exploiting residual cocoa biomass to extract advanced materials as building blocks for manufacturing nanoparticles aimed at alleviating formation-induced oxidative stress on human dermal fibroblasts
Source: Royal Society of Chemistry journal article supplement (doi:10.1039/d4na00248b), 2024-01-01

### Supplementary material

#### Exploiting residual cocoa biomass to extract advanced materials as building blocks for manufacturing nanoparticles aimed at alleviating formation-induced oxidative stress in cells

Joel Girón-Hernández, Yeison Barrios Rodriguez, Noemi Corbezzolo, Dayana Orozco Blanco, Carlos Carranza Gutierrez, William Cheung, Piergiorgio Gentile

**Table S1.** Values of explanatory variables: solvent/CPH ratio ( $X_1$ ), temperature ( $X_2$ ), extraction time ( $X_3$ ), and response variable: TPC ( $Y_1$ ).

| Run | $X_1$ , Solvent/CPH ratio (mL/g) | $X_2$ , Temperature (°C) | $X_3$ , Extraction time (min) | $Y_1$ , TPC GA (mg/g) |
|-----|----------------------------------|--------------------------|-------------------------------|-----------------------|
| 1   | 15.0                             | 30.0                     | 50.0                          | 2.95                  |
| 2   | 22.5                             | 40.0                     | 37.5                          | 2.50                  |
| 3   | 22.5                             | 40.0                     | 37.5                          | 2.50                  |
| 4   | 30.0                             | 30.0                     | 50.0                          | 2.85                  |
| 5   | 30.0                             | 30.0                     | 25.0                          | 2.68                  |
| 6   | 35.1                             | 40.0                     | 37.5                          | 2.81                  |
| 7   | 30.0                             | 50.0                     | 25.0                          | 3.02                  |
| 8   | 22.5                             | 56.8                     | 37.5                          | 2.80                  |
| 9   | 15.0                             | 50.0                     | 25.0                          | 2.55                  |
| 10  | 15.0                             | 30.0                     | 25.0                          | 2.06                  |
| 11  | 15.0                             | 50.0                     | 50.0                          | 2.41                  |
| 12  | 22.5                             | 40.0                     | 16.5                          | 2.41                  |
| 13  | 22.5                             | 23.2                     | 37.5                          | 2.78                  |
| 14  | 22.5                             | 40.0                     | 37.5                          | 2.46                  |
| 15  | 30.0                             | 50.0                     | 50.0                          | 2.34                  |
| 16  | 22.5                             | 40.0                     | 37.5                          | 2.52                  |
| 17  | 22.5                             | 40.0                     | 37.5                          | 2.40                  |
| 18  | 22.5                             | 40.0                     | 58.5                          | 2.59                  |
| 19  | 9.9                              | 40.0                     | 37.5                          | 2.27                  |
| 20  | 22.5                             | 40.0                     | 37.5                          | 2.41                  |

The optimised conditions for the extraction of antioxidants were as follows: a 35.11 (mL/g) of solvent/solid ratio (CPH), temperature of 56.8 °C and an extraction time of 16.5 minutes.

**Table S2.** Values of explanatory variables: solvent/CPH ratio ( $X_1$ ), temperature ( $X_2$ ), extraction time ( $X_3$ ), and response variable: pectin extraction yield ( $Y_1$ ).

| Run | $X_1$ , Solvent/CPH ratio (mL/g) | $X_2$ , Temperature ( $^{\circ}$ C) | $X_3$ , Extraction time (min) | $Y_1$ , Pectin yield (%) |
|-----|----------------------------------|-------------------------------------|-------------------------------|--------------------------|
| 1   | 50.0                             | 50.0                                | 45.0                          | 18.50                    |
| 2   | 40.0                             | 60.0                                | 67.5                          | 20.97                    |
| 3   | 40.0                             | 60.0                                | 105.3                         | 20.29                    |
| 4   | 56.8                             | 60.0                                | 67.5                          | 17.65                    |
| 5   | 30.0                             | 70.0                                | 45.0                          | 16.22                    |
| 6   | 30.0                             | 70.0                                | 90.0                          | 14.69                    |
| 7   | 40.0                             | 60.0                                | 67.5                          | 18.90                    |
| 8   | 40.0                             | 60.0                                | 67.5                          | 18.45                    |
| 9   | 50.0                             | 50.0                                | 90.0                          | 15.10                    |
| 10  | 40.0                             | 60.0                                | 67.5                          | 20.21                    |
| 11  | 23.2                             | 60.0                                | 67.5                          | 11.26                    |
| 12  | 40.0                             | 60.0                                | 67.5                          | 19.47                    |
| 13  | 40.0                             | 60.0                                | 67.5                          | 17.86                    |
| 14  | 40.0                             | 60.0                                | 29.7                          | 15.16                    |
| 15  | 50.0                             | 70.0                                | 90.0                          | 22.65                    |
| 16  | 30.0                             | 50.0                                | 45.0                          | 16.52                    |
| 17  | 40.0                             | 43.2                                | 67.5                          | 15.78                    |
| 18  | 30.0                             | 50.0                                | 90.0                          | 17.62                    |
| 19  | 50.0                             | 70.0                                | 45.0                          | 15.04                    |
| 20  | 40.0                             | 76.8                                | 67.5                          | 17.40                    |

The optimised conditions for alkaline pectin extraction were as follows: ratio of 44.6 mL/g, temperature of 76.8  $^{\circ}$ C, and an extraction time of 105.3 minutes.

**Table S3.** Values of explanatory variables: enzyme/ material ratio ( $X_1$ ), CPH powder concentration ( $X_2$ ), extraction time ( $X_3$ ), and response variable: pectin extraction yield ( $Y_1$ ).

| Run | $X_1$ , Solvent/CPH ratio (mL/g) | $X_2$ , g enzyme/g CPH ratio (%) | $X_3$ , Extraction time (h) | $Y_1$ , Pectin yield (%) |
|-----|----------------------------------|----------------------------------|-----------------------------|--------------------------|
| 1   | 50                               | 5.5                              | 6                           | 8.00                     |
| 2   | 40                               | 5.5                              | 15                          | 10.31                    |
| 3   | 50                               | 1                                | 15                          | 11.40                    |
| 4   | 30                               | 1                                | 15                          | 8.69                     |
| 5   | 50                               | 10                               | 15                          | 10.40                    |
| 6   | 40                               | 1                                | 6                           | 5.33                     |
| 7   | 30                               | 10                               | 15                          | 7.26                     |
| 8   | 30                               | 5.5                              | 24                          | 8.29                     |
| 9   | 40                               | 10                               | 24                          | 9.60                     |
| 10  | 30                               | 5.5                              | 6                           | 5.77                     |
| 11  | 40                               | 5.5                              | 15                          | 8.98                     |
| 12  | 40                               | 10                               | 6                           | 6.13                     |
| 13  | 40                               | 1                                | 24                          | 9.87                     |
| 14  | 40                               | 5.5                              | 15                          | 8.36                     |
| 15  | 50                               | 5.5                              | 24                          | 11.00                    |

The optimised conditions for enzymatic pectin extraction were as follows: a 2% (w/v) of CPH powder dissolved in sodium acetate buffer, a 1% ratio (g enzyme/extraction volume), and an extraction time of 22 hours.

**Table S4.** List of metabolites identified in CPH metabolites mix with an MS/MS score of 70% or higher, with their relative abundance (%). NP means

| Compound                                                                               | %       | Compound                                                                                                                                               | %      |
|----------------------------------------------------------------------------------------|---------|--------------------------------------------------------------------------------------------------------------------------------------------------------|--------|
| DL-Tartaric acid                                                                       | 27.5739 | 3-Hydroxy-3-(methoxycarbonyl)pentanedioic acid                                                                                                         | 0.0418 |
| Gluconic acid                                                                          | 16.7958 | Kaempferol-7-O-neohesperidoside                                                                                                                        | 0.0391 |
| Methylmalonic acid                                                                     | 11.1273 | NP-016455                                                                                                                                              | 0.0366 |
| (15Z)-9,12,13-Trihydroxy-15-octadecenoic acid                                          | 9.7260  | NP-020515                                                                                                                                              | 0.0365 |
| D-(+)-Galactose                                                                        | 7.4446  | 5,7-Dihydroxy-2-(4-hydroxyphenyl)-6,8-bis[3,4,5-trihydroxy-6-(hydroxymethyl)tetrahydro-2H-pyran-2-yl]-4H-chromen-4-one                                 | 0.0345 |
| Corchorifatty acid F                                                                   | 3.6382  | NP-015948                                                                                                                                              | 0.0332 |
| DL-Malic acid                                                                          | 2.1296  | 4-Hydroxybutyric acid (GHB)                                                                                                                            | 0.0317 |
| Azelaic acid                                                                           | 1.9499  | 4-oxo-4,5,6,7-tetrahydrobenzo[b]furan-3-carboxylic acid                                                                                                | 0.0315 |
| Mesaconic acid                                                                         | 1.2971  | 4-Acetyl-3-hydroxy-5-methylphenyl $\beta$ -D-glucopyranoside                                                                                           | 0.0313 |
| 3-Butene-1,2,3-tricarboxylic acid                                                      | 1.2112  | 6-Hydroxypicolinic acid                                                                                                                                | 0.0297 |
| $\alpha,\alpha$ -Trehalose                                                             | 1.1467  | Abscisic acid                                                                                                                                          | 0.0296 |
| (2R)-2,3-Dihydroxypropanoic acid                                                       | 1.0142  | Procyanidin B1                                                                                                                                         | 0.0276 |
| 12(13)-DiHOME                                                                          | 0.9835  | 2-(Acetylamino)hexanoic acid                                                                                                                           | 0.0253 |
| 1,2,3-cyclopropanetricarboxylic acid                                                   | 0.8778  | Apigenin                                                                                                                                               | 0.0233 |
| 9-HpODE                                                                                | 0.8557  | 4-( $\beta$ -D-Glucopyranosyloxy)-2-methylenebutanoic acid                                                                                             | 0.0193 |
| 4-Oxoproline                                                                           | 0.8286  | 4,4'-Sulfonylbis[2-(prop-2-en-1-yl)phenol]                                                                                                             | 0.0183 |
| 3-Anisic acid                                                                          | 0.7156  | (2E)-4-Hydroxy-3,7-dimethyl-2,6-octadien-1-yl $\beta$ -D-glucopyranoside                                                                               | 0.0166 |
| N-{4-[(R)-[(3R)-4-(4-Fluorobenzyl)-5-oxo-3-morpholinyl](hydroxymethyl)phenyl]acetamide | 0.7088  | 8(S),15(S)-DiHETE                                                                                                                                      | 0.0165 |
| Catechin                                                                               | 0.6399  | 12-Hydroxy-10-(hydroxymethyl)-6-methyl-2-(4-methyl-3-penten-1-yl)-2,6,10-dodecatricarboxylic acid                                                      | 0.0145 |
| trans-Aconitic acid                                                                    | 0.6325  | 3-[(1-Carboxyvinyl)oxy]benzoic acid                                                                                                                    | 0.0140 |
| Methylsuccinic acid                                                                    | 0.6277  | N-[(1S,3aS,5S,7aR)-5-Hydroxy-7a-{3-[4-(2-methoxyphenyl)-1-piperazinyl]-3-oxopropyl}-3,3,5-trimethyloctahydro-1H-inden-1-yl]nicotinamide                | 0.0136 |
| Oryzalin                                                                               | 0.5017  | NP-019498                                                                                                                                              | 0.0131 |
| 6-Hydroxycaproic acid                                                                  | 0.4620  | NP-012551                                                                                                                                              | 0.0115 |
| Glutaric acid                                                                          | 0.4571  | NP-020174                                                                                                                                              | 0.0102 |
| NP-008309                                                                              | 0.4380  | 4-Butyl-N-(3-cyano-2-thienyl)benzamide                                                                                                                 | 0.0100 |
| 2-Methylbutyl $\beta$ -D-glucopyranoside                                               | 0.4203  | [(3S,4R,5S)-5-[[[(2S,3R,4S,5S,6R)-4,5-dihydroxy-6-(hydroxymethyl)-2-(4-hydroxyphenoxy)oxan-3-yl]oxy]-3,4-dihydroxyoxolan-3-yl]methyl 4-hydroxybenzoate | 0.0099 |
| Gallic acid                                                                            | 0.3962  | 3,5-Dihydroxy-2-(4-hydroxyphenyl)-4-oxo-3,4-dihydro-2H-chromen-7-yl hexopyranoside                                                                     | 0.0088 |
| D-(+)-Malic acid                                                                       | 0.3396  | 12-Epileukotriene B4                                                                                                                                   | 0.0088 |
| 9,10-dihydroxy-12Z-octadecenoic acid                                                   | 0.3013  | Arjungenin                                                                                                                                             | 0.0083 |
| L-Iditol                                                                               | 0.2943  | (2E)-4-Hydroxy-4-{4-hydroxy-2-[(1E)-6-hydroxy-1-hepten-1-yl]cyclopentyl}-2-butenic acid                                                                | 0.0068 |
| 2,5-Dihydroxybenzaldehyde                                                              | 0.2713  | 7-Hydroxy-2-(4-hydroxyphenyl)-4-oxo-3,4-dihydro-2H-chromen-5-yl $\beta$ -D-glucopyranoside                                                             | 0.0068 |
| NP-020139                                                                              | 0.2538  | 3-Hydroxybenzyl alcohol                                                                                                                                | 0.0065 |
| 2-Furoic acid                                                                          | 0.2184  | (2E)-5-hydroxy-N-[3-(5-{3-[(2E)-5-hydroxy-3-methylpent-2-enamido]propyl}-3,6-dioxopiperazin-2-yl)propyl]-3-methylpent-2-enamide                        | 0.0062 |
| Neochlorogenic acid                                                                    | 0.2180  | 3-Methylxanthine                                                                                                                                       | 0.0060 |
| 2,4,6-Trihydroxyacetophenone                                                           | 0.1954  | Astragaloside                                                                                                                                          | 0.0058 |
| 2-Hydroxy-2-methyl-3-buten-1-yl $\beta$ -D-glucopyranoside                             | 0.1809  | (3 $\beta$ ,5 $\xi$ ,9 $\xi$ )-3,23-Dihydroxy-1-oxoolean-12-en-28-oic acid                                                                             | 0.0054 |
| NP-018716                                                                              | 0.1668  | NP-003191                                                                                                                                              | 0.0048 |
| 3-tert-Butyladipic acid                                                                | 0.1629  | 5-Chlorosalicylic acid                                                                                                                                 | 0.0048 |

|                                                                       |        |                                                                                                                          |        |
|-----------------------------------------------------------------------|--------|--------------------------------------------------------------------------------------------------------------------------|--------|
| NP-020205                                                             | 0.1610 | 4-[4-(4-Hydroxy-3-methoxyphenyl)tetrahydro-1H,3H-furo[3,4-c]furan-1-yl]-2-methoxyphenyl hexopyranoside                   | 0.0045 |
| 1-(Carboxymethyl)cyclohexanecarboxylic acid                           | 0.1340 | 1-Phenyl-1H-pyrazolo[3,4-d]pyrimidin-4-amine                                                                             | 0.0038 |
| 1-(4-fluorophenyl)-2-(4-methoxyphenyl)-4-(2-naphthyl)butane-1,4-dione | 0.1325 | 13-HODE                                                                                                                  | 0.0033 |
| NP-020916                                                             | 0.1169 | N-Acetyl-L-tyrosine                                                                                                      | 0.0031 |
| NP-013285                                                             | 0.1169 | 4,5-Dicaffeoylquinic acid                                                                                                | 0.0027 |
| 4-(hydroxymethyl)benzoic acid                                         | 0.1158 | 3-Hydroxybutyric acid                                                                                                    | 0.0027 |
| Pimelic acid                                                          | 0.1134 | Chlorogenic acid                                                                                                         | 0.0025 |
| Kaempferol-3-Glucuronide                                              | 0.1094 | $\alpha$ -Cyano-3-hydroxycinnamic acid                                                                                   | 0.0024 |
| Pyrogallol                                                            | 0.1088 | (1S,3R,4R,5R)-1,3,4-trihydroxy-5-[(2E)-3-(4-hydroxy-3-methoxyphenyl)prop-2-enoyl]oxy)cyclohexane-1-carboxylic acid       | 0.0019 |
| Lariciresinol 4-O-glucoside                                           | 0.0996 | 1,3,7-Trimethyluric acid                                                                                                 | 0.0017 |
| D-(-)-Quinic acid                                                     | 0.0966 | 2-Hydroxymyristic acid                                                                                                   | 0.0016 |
| N-Acetyl-DL-tryptophan                                                | 0.0921 | (3R,5R)-1,3,5-Trihydroxy-4-[(2E)-3-(4-hydroxy-3-methoxyphenyl)-2-propenoyl]oxy)cyclohexanecarboxylic acid                | 0.0014 |
| 2,3-dinor-8-iso Prostaglandin F2?                                     | 0.0763 | 4-Aminosalicylic acid                                                                                                    | 0.0013 |
| Terephthalic acid                                                     | 0.0680 | 3-Fluoro-N-(((1S,4S,6S)-6-isopropyl-3-methyl-4-[2-oxo-2-(2-propyn-1-ylamino)ethyl]-2-cyclohexen-1-yl)methyl)benzamide    | 0.0012 |
| 3-Hydroxyphenylacetic acid                                            | 0.0656 | 2-(4-Hydroxyphenyl)ethyl 6-O-[(2R,3R,4R)-3,4-dihydroxy-4-(hydroxymethyl)tetrahydro-2-furanyl]-beta-D-glucopyranoside     | 0.0012 |
| NP-018661                                                             | 0.0596 | 5-[[[(2R,4S,5R)-5-[1-Methyl-3-(2-thienyl)-1H-pyrazol-5-yl]-1-azabicyclo[2.2.2]oct-2-yl)methyl]amino]-5-oxopentanoic acid | 0.0008 |
| 4-Hydroxybenzaldehyde                                                 | 0.0588 | 13,14-Dihydro-15-keto Prostaglandin A2                                                                                   | 0.0008 |
| Quercetin-3 $\beta$ -D-glucoside                                      | 0.0527 | Resolvin E1                                                                                                              | 0.0008 |
| Catechol                                                              | 0.0519 | Rutin                                                                                                                    | 0.0008 |
| Cynaroside                                                            | 0.0492 | 2,4,6-Trihydroxy-2-(4-hydroxybenzyl)-1-benzofuran-3(2H)-one                                                              | 0.0007 |
| 13,14-Dihydro-15-keto-tetranor prostaglandin F1 $\alpha$              | 0.0464 | Linoleic acid-biotin                                                                                                     | 0.0007 |
| NP-005196                                                             | 0.0450 | 4-Methylphenol                                                                                                           | 0.0007 |
| Tetradecanedioic acid                                                 | 0.0440 | Oleic acid-biotin                                                                                                        | 0.0006 |
| 12(13)-DiHOME                                                         | 0.0433 | NP-003535                                                                                                                | 0.0004 |

**Figure S1.** Metabolic activity of Neo-dermal fibroblast cells after 48 h of seeding in presence of different concentration (from 1000 to 100  $\mu\text{g}/\text{mL}$ ) of the metabolites mix. The results are shown as average  $\pm$  SD after normalisation to the control of cells seeded on TCPs (A); Live/Dead images of Neo-dermal fibroblast cells after 48 h of seeding in presence of different concentration metabolites mix: 100 (B), 250 (C), 500 (D) and (E) 1000  $\mu\text{g}/\text{mL}$ . Scale bar = 300  $\mu\text{m}$ .

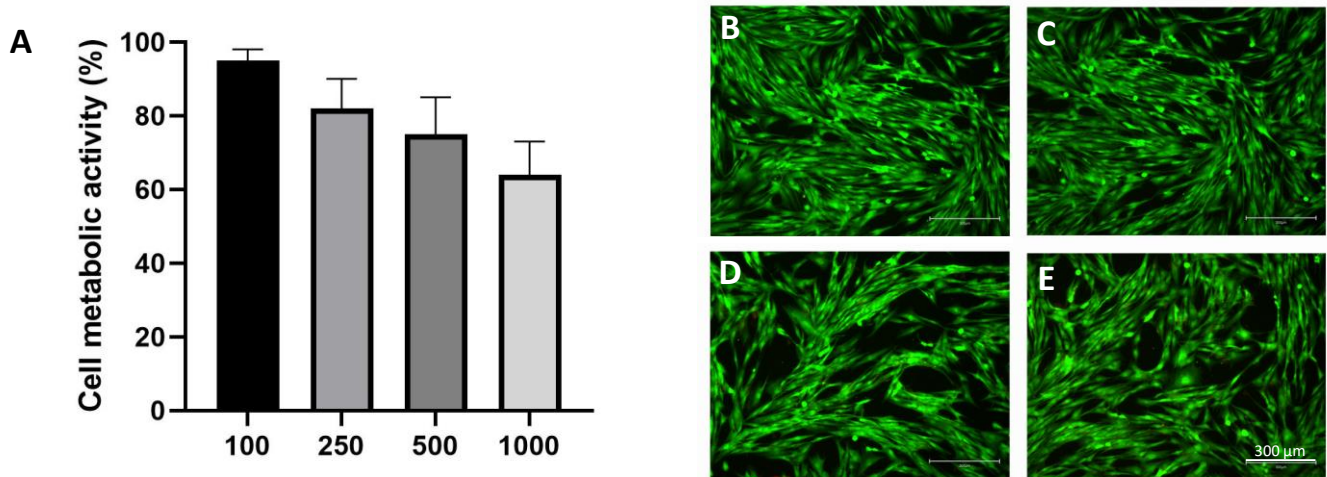

**Figure S2.** Fluorescent images of the repressive effect of ROS activity after  $\text{H}_2\text{O}_2$ -induced intracellular oxidative stress on Neo-dermal fibroblasts (A) and different concentration metabolites mix: 10, 50, 100 and 500  $\mu\text{g}/\text{mL}$  (C). Fluorescent image of the fibroblasts without  $\text{H}_2\text{O}_2$ -induced intracellular oxidative stress are used as control (B). Scale bar = 300  $\mu\text{m}$ .

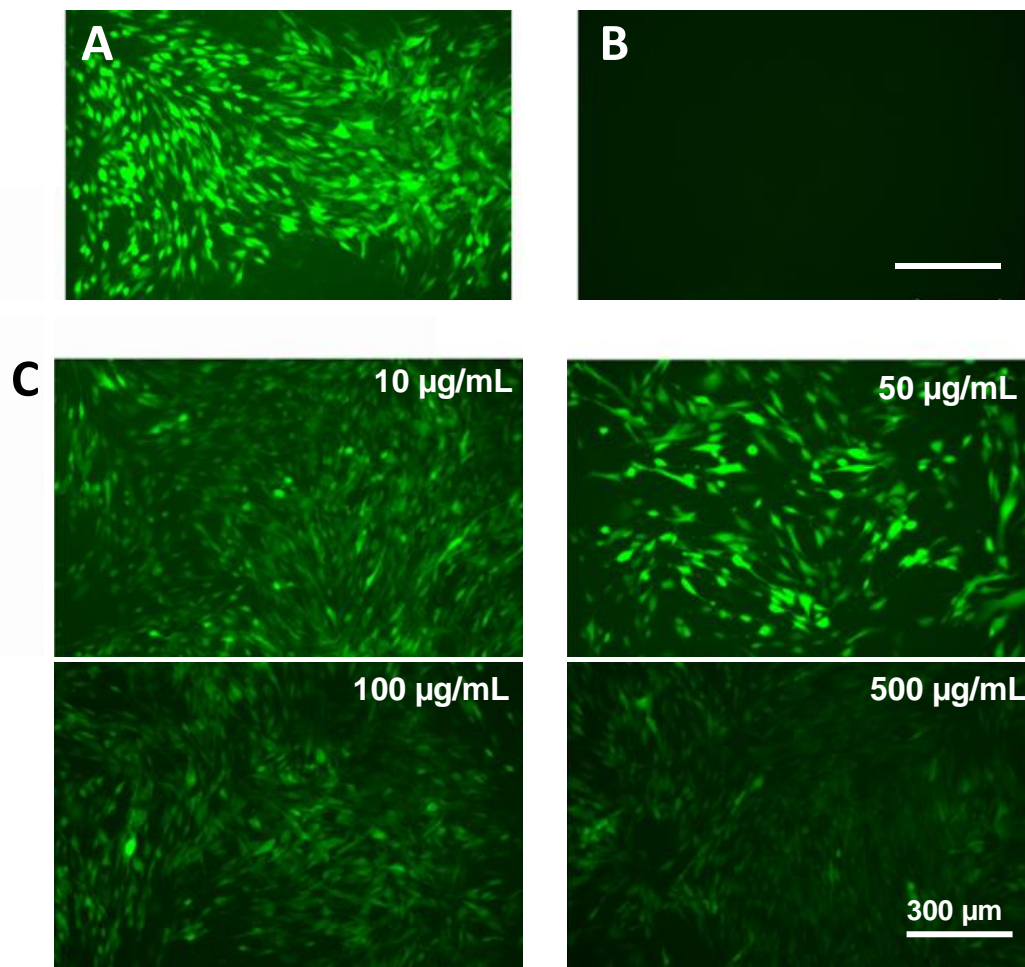

Supplement: d4na00248b1.pdf [file d4na00248b1.pdf]
